# Supplementary material for: Evaluation of Coping Strategies among Students with Type D Personality
Source: MDPI journal article supplement (doi:10.3390/ijerph19084918), 2022-04-18
Supplement: s1 [file s1]

**Suppl. Table S1.** Receiver operating characteristic curve analysis. Performance of Type D components in discriminating the presence of the pronounced preference for the "Escape-avoidance" strategy.

**Area Under the Curve**

| Test Result Variable(s) | Area  |
|-------------------------|-------|
| NA                      | 0.749 |
| SI                      | 0.643 |
| Type D                  | 0.715 |
| zNA×zSI                 | 0.518 |

The test result variable(s): NA, SI, Type D, zNA×zSI has at least one tie between the positive actual state group and the negative actual state group.

**Suppl. Table S2.** Logistic regression analysis of the relationship between personality type D components (HA and SI) and their interaction on indicators of coping strategy scales (WSQ and CSI scales)

|                                | Model      | Unstandardized Coefficients |            | Standardized Coefficients | T      | Sig.  | Unstandardized Coefficients |            | Standardized Coefficients | t      | Sig.  |
|--------------------------------|------------|-----------------------------|------------|---------------------------|--------|-------|-----------------------------|------------|---------------------------|--------|-------|
|                                |            | B                           | Std. Error |                           |        |       | B                           | Std. Error |                           |        |       |
| Confrontational coping         | (Constant) | 57.337                      | 1.113      |                           | 51.493 | 0.000 | 57.468                      | 1.161      |                           | 49.491 | 0.000 |
|                                | Zscore(NA) | 2.212                       | 1.176      | 0.198                     | 1.882  | 0.063 | 2.210                       | 1.181      | 0.198                     | 1.871  | 0.064 |
|                                | Zscore(SI) | 0.649                       | 0.515      | 0.130                     | 1.262  | 0.210 | -1.610                      | 1.188      | -0.144                    | -1.356 | 0.178 |
|                                | zNA×zSI    |                             |            |                           |        |       | -0.433                      | 1.032      | -0.043                    | -0.420 | 0.675 |
| Distance                       | (Constant) | 58.316                      | 0.940      |                           | 62.060 | 0.000 | 58.608                      | 0.974      |                           | 60.145 | 0.000 |
|                                | Zscore(NA) | 1.755                       | 0.992      | 0.182                     | 1.769  | 0.080 | 1.750                       | 0.991      | 0.182                     | 1.766  | 0.081 |
|                                | Zscore(SI) | 1.723                       | 0.992      | 0.179                     | 1.737  | 0.086 | 1.842                       | 0.997      | 0.191                     | 1.848  | 0.068 |
|                                | zNA×zSI    |                             |            |                           |        |       | -0.963                      | 0.866      | -0.110                    | -1.112 | 0.269 |
| Self-control                   | (Constant) | 52.786                      | 0.841      |                           | 62.754 | 0.000 | 53.148                      | 0.867      |                           | 61.305 | 0.000 |
|                                | Zscore(NA) | 1.197                       | 0.888      | 0.138                     | 1.348  | 0.181 | 1.190                       | 0.882      | 0.137                     | 1.350  | 0.180 |
|                                | Zscore(SI) | 2.119                       | 0.888      | 0.244                     | 2.386  | 0.019 | 2.266                       | 0.887      | 0.261                     | 2.556  | 0.012 |
|                                | zNA×zSI    |                             |            |                           |        |       | -1.197                      | 0.770      | -0.151                    | -1.554 | 0.124 |
| Strong preference for strategy | (Constant) | 50.286                      | 0.934      |                           | 53.815 | 0.000 | 50.200                      | 0.975      |                           | 51.498 | 0.000 |
|                                | Zscore(NA) | 1.534                       | 0.987      | 0.164                     | 1.555  | 0.123 | 1.536                       | 0.991      | 0.164                     | 1.550  | 0.125 |
|                                | Zscore(SI) | -1.786                      | 0.987      | -0.191                    | -1.811 | 0.073 | -1.821                      | 0.997      | -0.194                    | -1.827 | 0.071 |
|                                | zNA×zSI    |                             |            |                           |        |       | 0.283                       | 0.866      | 0.033                     | 0.326  | 0.745 |
| Acceptance of responsibility   | (Constant) | 54.663                      | 0.994      |                           | 55.009 | 0.000 | 55.129                      | 1.022      |                           | 53.955 | 0.000 |
|                                | Zscore(NA) | 3.511                       | 1.049      | 0.335                     | 3.347  | 0.001 | 3.502                       | 1.039      | 0.334                     | 3.371  | 0.001 |
|                                | Zscore(SI) | 0.843                       | 1.049      | 0.081                     | 0.804  | 0.423 | 1.033                       | 1.045      | 0.099                     | 0.988  | 0.326 |
|                                | zNA×zSI    |                             |            |                           |        |       | -1.538                      | 0.908      | -0.161                    | -1.694 | 0.094 |
| Escape-avoidance               | (Constant) | 60.112                      | 0.888      |                           | 67.692 | 0.000 | 59.931                      | 0.924      |                           | 64.838 | 0.000 |
|                                | Zscore(NA) | 3.024                       | 0.938      | 0.311                     | 3.225  | 0.002 | 3.028                       | 0.940      | 0.311                     | 3.221  | 0.002 |
|                                | Zscore(SI) | 2.327                       | 0.938      | 0.239                     | 2.482  | 0.015 | 2.254                       | 0.945      | 0.232                     | 2.384  | 0.019 |

|                                |            |        |       |        |        |       |        |       |        |        |
|--------------------------------|------------|--------|-------|--------|--------|-------|--------|-------|--------|--------|
|                                | zNA×zSI    |        |       |        |        | 0.597 | 0.821  | 0.067 | 0.727  | 0.469  |
| Problem planning               | (Constant) | 52.745 | 0.962 |        | 54.841 | 0.000 | 53.056 | 0.997 | 53.226 | 0.000  |
|                                | Zscore(NA) | 0.122  | 1.015 | 0.013  | 0.120  | 0.904 | 0.116  | 1.014 | 0.012  | 0.115  |
|                                | Zscore(SI) | -0.350 | 1.015 | -0.037 | -0.345 | 0.731 | -0.223 | 1.019 | -0.024 | -0.219 |
|                                | zNA×zSI    |        |       |        |        |       | -1.027 | 0.886 | -0.119 | -1.160 |
| Positive revaluation           | (Constant) | 54.612 | 0.898 |        | 60.791 | 0.000 | 54.852 | 0.933 | 58.779 | 0.000  |
|                                | Zscore(NA) | -0.412 | 0.948 | -0.046 | -0.434 | 0.665 | -0.417 | 0.949 | -0.046 | -0.439 |
|                                | Zscore(SI) | -1.569 | 0.948 | -0.175 | -1.654 | 0.101 | -1.471 | 0.954 | -0.164 | -1.542 |
|                                | zNA×zSI    |        |       |        |        |       | -0.792 | 0.829 | -0.097 | -0.956 |
| Problem solving strategy       | (Constant) | 24.500 | 0.386 |        | 63.453 | 0.000 | 24.596 | 0.401 | 61.283 | 0.000  |
|                                | Zscore(NA) | -0.003 | 0.408 | 0.000  | -0.007 | 0.994 | -0.005 | 0.408 | -0.001 | -0.012 |
|                                | Zscore(SI) | -0.735 | 0.408 | -0.191 | -1.803 | 0.075 | -0.696 | 0.410 | -0.181 | -1.696 |
|                                | zNA×zSI    |        |       |        |        |       | -0.316 | 0.357 | -0.090 | -0.888 |
| Social support search strategy | (Constant) | 20.724 | 0.492 |        | 42.147 | 0.000 | 20.571 | 0.510 | 40.345 | 0.000  |
|                                | Zscore(NA) | 0.371  | 0.519 | 0.074  | 0.715  | 0.476 | 0.374  | 0.518 | 0.074  | 0.722  |
|                                | Zscore(SI) | -1.500 | 0.519 | -0.298 | -2.889 | 0.005 | -1.562 | 0.521 | -0.311 | -2.995 |
|                                | zNA×zSI    |        |       |        |        |       | 0.506  | 0.453 | 0.110  | 1.117  |
| Avoidance strategy             | (Constant) | 18.490 | 0.487 |        | 37.941 | 0.000 | 18.545 | 0.508 | 36.491 | 0.000  |
|                                | Zscore(NA) | 1.055  | 0.515 | 0.212  | 2.051  | 0.043 | 1.054  | 0.517 | 0.212  | 2.039  |
|                                | Zscore(SI) | 0.649  | 0.515 | 0.130  | 1.262  | 0.210 | 0.672  | 0.520 | 0.135  | 1.292  |
|                                | zNA×zSI    |        |       |        |        |       | -0.184 | 0.451 | -0.040 | -0.407 |
